# Supplementary material for: Sero-Prevalence and Sero-Incidence of Antibodies to SARS-CoV-2 in Health Care Workers in Israel, Prior to Mass COVID-19 Vaccination
Source: PubMed Central journal article supplement (PMC8268152; doi:10.3389/fmed.2021.689994), 2021-06-24
Supplement: Data_Sheet_1.pdf [file Data_Sheet_1.pdf]

**Supplementary Table 1: Exposures to SARS-CoV-2 among the participants at baseline and follow-up assessments**

|                                                                                   | Baseline<br>April-May 2020<br>Number (%) | Follow-up<br>September-November 2020<br>Number (%) |
|-----------------------------------------------------------------------------------|------------------------------------------|----------------------------------------------------|
| <b>Total</b>                                                                      | 874 (100.0%)                             | 373 (100.0%)                                       |
| <b>Ever worked in a coronavirus department</b>                                    |                                          |                                                    |
| Yes                                                                               | 340 (48.9%)                              | 206 (55.2%)                                        |
| No                                                                                | 486 (55.6%)                              | 158 (42.4%)                                        |
| Missing                                                                           | 48 (5.5%)                                | 9 (2.4%)                                           |
| <b>Exposure to a confirmed COVID-19 patient</b>                                   |                                          |                                                    |
| Yes                                                                               | 206 (23.6%)                              | 221 (59.2%)                                        |
| No                                                                                | 586 (67.0%)                              | 139 (37.3%)                                        |
| I do not know                                                                     | 55 (6.3%)                                | -                                                  |
| Missing                                                                           | 27 (3.1%)                                | 13 (3.5%)                                          |
| <b>A quarantined family member due to exposure to a COVID-19 patient</b>          |                                          |                                                    |
| Yes                                                                               | 81 (9.3%)                                | 103 (27.6%)                                        |
| No                                                                                | 765 (87.5%)                              | 260 (69.7%)                                        |
| I do not know                                                                     | 6 (0.7%)                                 | 0 (0%)                                             |
| Missing                                                                           | 22 (2.5%)                                | 10 (2.7%)                                          |
| <b>Have you been tested for SARS-CoV-2 (PCR nasopharyngeal swab)?<sup>a</sup></b> |                                          |                                                    |
| Yes                                                                               | 310 (35.5%)                              | 265 (71.0%)                                        |
| No                                                                                | 540 (61.8%)                              | 100 (26.8%)                                        |
| Missing                                                                           | 24 (2.7%)                                | 8 (2.1%)                                           |
| <b>Result of SARS-CoV-2 PCR test among those tested<sup>ab</sup></b>              |                                          |                                                    |
| Positive                                                                          | 5 (1.6%)                                 | 20 (7.6%)                                          |
| Negative                                                                          | 299 (96.5%)                              | 244 (92.1%)                                        |
| Missing                                                                           | 6 (1.9%)                                 | 1 (0.3%)                                           |

<sup>a</sup> At the follow-up assessment the question was regarding a PCR test for SARS-CoV-2 in the past 3 months (i.e. not including the PCR test at the baseline assessment). <sup>b</sup> The positive PCR results for SARS-CoV-2 were taken during September-October, i.e. not included the positives at baseline assessment

**Supplementary table 2: Missing information by variable**

| <b>Variable</b>                                                             | <b>Number (%)<br/>with missing<br/>information</b> |
|-----------------------------------------------------------------------------|----------------------------------------------------|
| age                                                                         | 5 (1.3%)                                           |
| Profession                                                                  | 3 (0.8%)                                           |
| Years in the profession                                                     | 22 (5.9%)                                          |
| Ever worked in a coronavirus department                                     | 9 (2.4%)                                           |
| Worked in a coronavirus department in the past 3 months                     | 18 (4.8%)                                          |
| Exposure to a confirmed COVID-19 patient in the past 3 months               | 13 (3.5%)                                          |
| Requested to be quarantined due to exposure to a confirmed COVID-19 patient | 11 (3.0%)                                          |
| A quarantined family member due to exposure to a COVID-19 patient           | 10 (2.7%)                                          |
| SARS-CoV-2 test by PCR                                                      | 8 (2.2%)                                           |
| Result of SARS-CoV-2 PCR test                                               | 1 (0.4%)                                           |

Percent out of 372 participants with useable serum samples
